# Supplementary material for: An integrative variant analysis suite for whole exome next-generation sequencing data
Source: Springer Nature journal article supplement (doi:10.1186/1471-2105-13-8), 2012-01-12

**a.**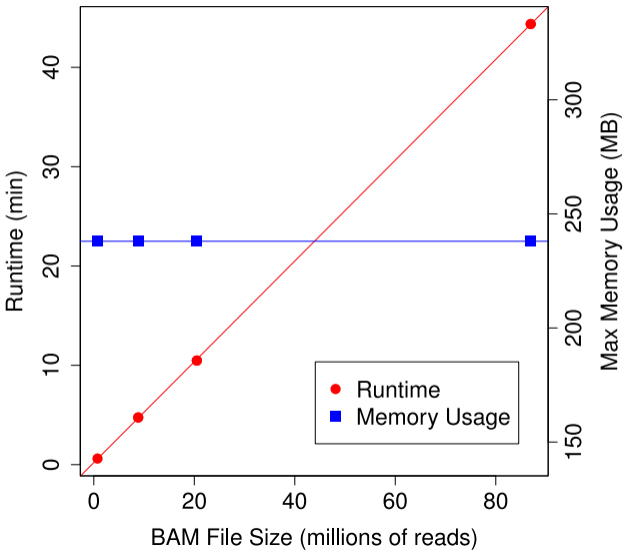**b.**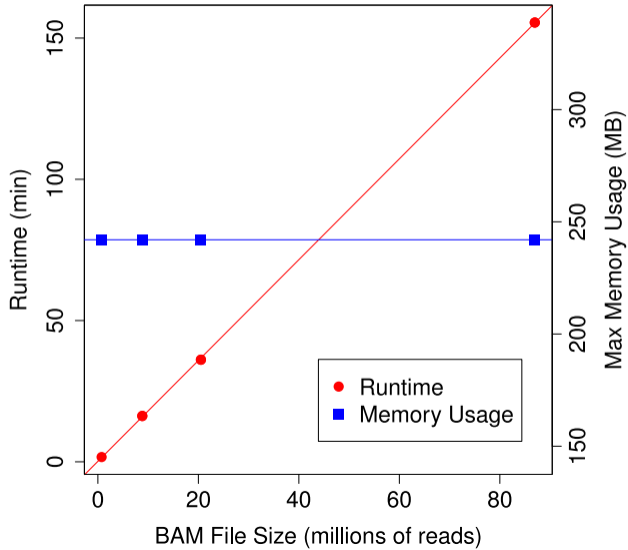

Supplement: 12859_2011_5039_MOESM8_ESM.pdf [file 12859_2011_5039_MOESM8_ESM.pdf]
